# Supplementary material for: Waste HD-PE plastic, deformation into liquid hydrocarbon fuel using pyrolysis-catalytic cracking with a CuCO3 catalyst
Source: Royal Society of Chemistry journal article supplement (doi:10.1039/c8se00040a), 2018-01-01
Supplement: c8se00040a1.xlsx [file c8se00040a1.xlsx]

## Sheet: SAMPLE-5
						1D Chromatogram
						CONTOUR PLOT
							SURFACE PLOT
							Classification of Peaks
				Peak List as per classification
		Peak #	Name	Classifications	S/N	Similarity	Group	R.T. (s)	Area
		1	Nonane	Saturate	4420.7	917		476 , 0.920	19228474
		7	Decane	Saturate	13479	789		560 , 0.940	19472606
		29	Undecane	Saturate	24836	941		648 , 0.970	93598080
		79	Dodecane	Saturate	30986	855		736 , 0.990	33273337
		134	Tridecane	Saturate	31997	774		816 , 1.010	31291723
		184	Tetradecane	Saturate	27713	738		892 , 1.020	30306781
		186	Tetradecane	Saturate	16601	942		896 , 1.010	171670847
		240	Pentadecane	Saturate	25912	930		968 , 1.030	99877080537
		287	Hexadecane	Saturate	18578	916		1032 , 1.050	205969156
		332	Heptadecane	Saturate	20558	897		1100 , 1.070	160436681
		373	Octadecane	Saturate	17692	915		1160 , 1.090	169671000
		399	Nonadecane	Saturate	2460.9	749		1224 , 1.090	34386697
		420	Eicosane	Saturate	8949.9	939		1272 , 1.130	200763969
		439	Heneicosane	Saturate	6775.3	941		1328 , 1.160	163966492
		461	Docosane	Saturate	5918.1	944		1380 , 1.250	121781447
		479	Tricosane	Saturate	4104.4	571		1436 , 1.350	35381184
		490	Tetracosane	Saturate	5438.3	880		1496 , 1.470	101044613
		498	Pentacosane	Saturate	7097.5	919		1568 , 1.630	83010039
		383	Phenanthrene	Phenanthrene	29635	942		1188 , 1.510	11268311
		384	4-Phenanthrenol, 1,2,3,4-tetrahydro-4-methyl-	Phenanthrene	3878.3	777		1192 , 1.400	3564796
		395	9H-Fluorene, 9,9-dimethyl-	Phenanthrene	4310.2	875		1212 , 1.420	8837433
		396	Anthracene, 9,10-dihydro-9,10-dimethyl-	Phenanthrene	2513.6	729		1216 , 1.410	2455980
		398	9H-Fluorene, 9,9-dimethyl-	Phenanthrene	4085.2	876		1220 , 1.460	2219688
		412	Phenanthrene, 1-methyl-	Phenanthrene	4568.6	922		1256 , 1.540	4306205
		414	5H-Dibenzo[a,c]cyclohepten-5-ol	Phenanthrene	3031.2	795		1260 , 1.440	7767514
		421	Phenanthrene, 1-methyl-	Phenanthrene	8059.4	917		1272 , 1.610	5649189
		14	Cyclodecane	Cyclic /branched	2594	850		600 , 0.970	38667277
		15	Oxalic acid, isobutyl nonyl ester	Cyclic /branched	2513.8	823		604 , 0.940	11032287
		16	Cyclopentene, 1-butyl-	Cyclic /branched	2873	852		608 , 0.980	10470297
		19	2-Undecyne	Cyclic /branched	2047.8	849		616 , 0.990	8165961
		18	Decane, 2-methyl-	Cyclic /branched	2587.5	883		616 , 0.940	20963341
		22	1-Decene, 9-methyl-	Cyclic /branched	5854.8	836		624 , 0.950	18241098
		24	1,10-Undecadiene	Cyclic /branched	5980	857		636 , 0.970	91436006
		35	5-Undecyne	Cyclic /branched	6147.5	831		664 , 0.990	69601236
		34	2-Undecene, (Z)-	Cyclic /branched	3298.6	914		664 , 0.970	30732081
		40	2-Undecyne	Cyclic /branched	2170.7	828		672 , 1.000	27632616
		39	5-Undecene, (E)-	Cyclic /branched	2621.6	864		672 , 0.970	62922708
		41	Octane, 5-ethyl-2-methyl-	Cyclic /branched	2146.2	819		676 , 0.950	442917544
		44	Unknown 2	Cyclic /branched	6158.4	553		684 , 1.000	4223526
		43	1-Decyne	Cyclic /branched	3801	779		684 , 0.980	68370377
		45	Unknown 3	Cyclic /branched	1619.2	694		684 , 1.020	7965150
		47	5-Ethyldecane	Cyclic /branched	5382.8	835		688 , 0.960	24600063
		49	1H-Indene, 1-ethylideneoctahydro-, trans-	Cyclic /branched	2553	781		692 , 1.030	7902586
		48	Cyclopropane, 1-hexyl-2-propyl-, cis-	Cyclic /branched	4440.7	861		692 , 0.970	486342663
		50	Octane, 4-ethyl-	Cyclic /branched	5526.9	860		696 , 0.960	34781626
		52	Benzene, 1,3-diethyl-5-methyl-	Cyclic /branched	12893	891		696 , 1.050	13512883
		51	Cyclopentene,1-hexyl-	Cyclic /branched	6110.8	871		696 , 1.000	61598486
		55	2-Ethyl-1-dodecanol	Cyclic /branched	5513.3	833		704 , 0.970	63714592
		59	Undecane, 3-methyl-	Cyclic /branched	6269.8	908		712 , 0.960	22904002
		60	Cycloundecene(Z)	Cyclic /branched	5000.4	863		712 , 1.010	43425243
		63	anti-10-Methyl-endo-tricyclo[5.2.1.0(2.6)]decane	Cyclic /branched	2224.4	778		716 , 1.040	18449709
		65	1,12-Tridecadiene	Cyclic /branched	6378.5	842		720 , 0.990	102071321
		66	Cyclododecene, (E)-	Cyclic /branched	1967.7	830		720 , 1.010	28142776
		70	Unknown 4	Cyclic /branched	3153.7	691		724 , 1.050	3286629
		69	1-Undecene, 2-methyl-	Cyclic /branched	9269	740		724 , 0.980	78109177
		74	Cyclododecane	Cyclic /branched	14224	902		728 , 1.010	70416839
		76	cis, cis-2-Ethylbicyclo[4.4.0]decane	Cyclic /branched	2297	748		732 , 1.020	25067720
		85	Bicyclo[5.1.0]octane, 8-(1-methylethylidene)-	Cyclic /branched	2400.6	802		740 , 1.040	37856659
		84	1,13-Tetradecadiene	Cyclic /branched	7652.3	825		740 , 1.010	41872726
		88	Benzene, 1,3-diethyl-5-methyl-	Cyclic /branched	7584.6	808		744 , 1.080	4868596
		87	Benzene, (1-methylpentyl)-	Cyclic /branched	5953.9	811		744 , 1.060	2991736
		90	Benzene, 1,4-diethyl-2-methyl-	Cyclic /branched	11669	789		748 , 1.080	3548768
		91	trans-Cinnamyl bromide	Cyclic /branched	5369.2	731		748 , 1.100	260257
		89	2-Dodecene, (Z)-	Cyclic /branched	7869.8	935		748 , 0.990	108215480
		94	Cyclododecene, (E)-	Cyclic /branched	8688.6	835		752 , 1.010	105104038
		95	6,7-Dimethyl-1,2,3,5,8,8a-hexahydronaphthalene	Cyclic /branched	3252	729		752 , 1.060	4461809
		96	1H-Indene, 2,3-dihydro-1,6-dimethyl-	Cyclic /branched	34226	894		752 , 1.110	10608988
		97	5-Decene, 4-ethynyl-, (E)-	Cyclic /branched	2234.7	784		756 , 1.040	11739188
		98	Bicyclo[6.1.0]nonane, 9-(1-methylethylidene)-	Cyclic /branched	2597.8	779		764 , 1.040	14710554
		99	Benzene, 1-methyl-2-(1-ethylpropyl)-	Cyclic /branched	7456.5	776		764 , 1.060	10700556
		100	Penta-2-en-4-yne,-2,5-dicyclopropyl	Cyclic /branched	2443.7	778		764 , 1.080	5782529
		101	Undecane	Cyclic /branched	6451.2	851		768 , 0.970	26500658
		102	Naphthalene, 1,2,3,4-tetrahydro-2-methyl-	Cyclic /branched	4012.6	812		768 , 1.120	2759394
		103	1,13-Tetradecadiene	Cyclic /branched	4728.8	831		772 , 0.990	99893839
		104	Unknown 7	Cyclic /branched	2859.2	526		772 , 1.020	874676
		106	Cyclohexane, hexyl-	Cyclic /branched	8544.2	830		776 , 1.010	23476203
		107	Benzene, (1-ethylbutyl)-	Cyclic /branched	5785.1	747		776 , 1.070	9062188
		105	Cyclodecane	Cyclic /branched	4810.6	817		776 , 0.990	44227292
		110	Benzene, (1-ethyl-1-propenyl)-	Cyclic /branched	10334	819		780 , 1.120	15448547
		109	1,Z-5,E-7-Dodecatriene	Cyclic /branched	1696.3	741		780 , 1.040	31574427
		108	Undecane, 2,4-dimethyl-	Cyclic /branched	9461.6	864		780 , 0.970	61453269
		111	Cyclopentene,1-heptyl-	Cyclic /branched	6545.4	826		784 , 1.010	48603522
		112	1H-Indene, 2,3-dihydro-1,5,7-trimethyl-	Cyclic /branched	6150.7	747		784 , 1.100	2748786
		114	7-Tetradecyne	Cyclic /branched	3617.1	852		788 , 1.020	32616571
		116	Naphthalene, 1,2,3,4-tetrahydro-1,1-dimethyl-	Cyclic /branched	4655.5	782		788 , 1.090	6577307
		115	Benzene, (1,3-dimethylbutyl)-	Cyclic /branched	7019.1	760		788 , 1.070	44235445
		113	Cyclopropane, 1-ethyl-2-heptyl-	Cyclic /branched	6054.3	857		788 , 0.980	52616072
		117	Tridecane, 4-methyl-	Cyclic /branched	8550.5	904		792 , 0.970	56225514
		118	Bicyclo[3.1.1]hept-2-ene-2-ethanol, 6,6-dimethyl-	Cyclic /branched	2240.9	713		792 , 1.050	34211549
		119	Cyclohexene,3-hexyl-	Cyclic /branched	5287.7	865		796 , 1.030	1101788568
		121	Benzene, (1-methylpentyl)-	Cyclic /branched	10787	776		800 , 1.070	14967857
		123	8-Hexadecyne	Cyclic /branched	7640.7	843		804 , 1.020	55221628
		125	Unknown 9	Cyclic /branched	6161.4	689		804 , 1.110	686721
		122	Cyclopentane, 3-hexyl-1,1-dimethyl-	Cyclic /branched	3649.4	800		804 , 0.990	80183791
		124	Unknown 8	Cyclic /branched	2575.5	648		804 , 1.050	24509743
		126	1-Tridecene	Cyclic /branched	11485	928		808 , 1.010	96017575
		128	1,7,7-Trimethyl-2-vinylbicyclo[2.2.1]hept-2-ene	Cyclic /branched	14150	806		808 , 1.090	11248388
		127	9-Octadecenal	Cyclic /branched	1896.8	836		808 , 1.050	484762006
		132	Perhydrophenalene, (3aà, 6aà, 9aà, 9bá)-	Cyclic /branched	1737.3	704		812 , 1.060	8540595
		133	Unknown 10	Cyclic /branched	7667.8	536		812 , 1.080	4826918
		140	Bicyclo[10.1.0]tridec-1-ene	Cyclic /branched	2585.3	824		828 , 1.060	375124928
		142	1-Octanol, 2-butyl-	Cyclic /branched	4893.9	827		832 , 0.980	79322285
		144	Unknown 12	Cyclic /branched	1689.2	524		832 , 1.070	1273939
		143	Bicyclo[4.1.0]heptane, 3,7,7-trimethyl-, [1S-(1à,3à,6à)]-	Cyclic /branched	4520.8	824		832 , 1.020	136320086
		146	Cyclotridecane	Cyclic /branched	1793.5	781		836 , 1.010	17637780
		148	Naphthalene, 5-ethyl-1,2,3,4-tetrahydro-	Cyclic /branched	9883.9	820		840 , 1.120	9872356
		149	Benzene, (3-propoxy-1-propenyl)-	Cyclic /branched	7662.9	758		844 , 1.070	13617327
		150	Tridecane, 5-propyl-	Cyclic /branched	5847.9	843		848 , 0.980	76007238
		154	Benzene, 2-(2-butenyl)-1,3,5-trimethyl-	Cyclic /branched	2195.9	710		852 , 1.100	5726407
		153	Cyclopropa[1,2:1,3]dicyclopenten-3(3aH)-one, 1,2,3b,6-tetrahydro-3a,6,6-trimethyl-	Cyclic /branched	8867.8	742		852 , 1.080	22242680
		152	Cyclododecene, 1-methyl-	Cyclic /branched	3513.6	857		852 , 1.030	338679708
		155	Naphthalene, 6-ethyl-1,2,3,4-tetrahydro-	Cyclic /branched	7124.4	842		852 , 1.130	13845909
		151	Cyclopropane, 1-methyl-2-octyl-	Cyclic /branched	4964.4	811		852 , 0.990	20449448
		158	Unknown 13	Cyclic /branched	3486	514		856 , 1.040	681743
		159	Bicyclo[2.2.1]heptane, 7,7-dimethyl-2-methylene-	Cyclic /branched	1756.2	706		856 , 1.050	70606740
		157	Tetradecane	Cyclic /branched	11090	869		856 , 0.980	47939302
		162	Naphthalene, 1,2,3,4-tetrahydro-1,1-dimethyl-	Cyclic /branched	11189	812		860 , 1.140	9833499
		161	(1,4-Dimethylpent-2-enyl)benzene	Cyclic /branched	3935.2	700		860 , 1.110	3018052
		160	3,5-Dodecadiyne, 2-methyl-	Cyclic /branched	4193.2	767		860 , 1.080	23350777
		163	4-Undecene, 4-methyl-, (Z)-	Cyclic /branched	4850	709		864 , 1.000	38784738
		164	Unknown 14	Cyclic /branched	4992.8	632		864 , 1.010	15184619
		168	3-Octadecyne	Cyclic /branched	3169	852		872 , 1.020	2132949569
		169	Unknown 16	Cyclic /branched	2397.4	630		872 , 1.110	2755387
		167	Tridecane, 3-methyl-	Cyclic /branched	6835.6	888		872 , 0.980	59312053
		171	Naphthalene, 1,2,3,4,4a,5,8,8a-octahydro-4a-methyl-, trans-	Cyclic /branched	2382.6	701		876 , 1.060	63113596
		173	Unknown 17	Cyclic /branched	2360.3	646		876 , 1.110	6794255
		172	Benzene, heptyl-	Cyclic /branched	9797.9	838		876 , 1.080	28525145
		175	9-Octadecyne	Cyclic /branched	5844.9	846		880 , 1.020	108753033
		176	Unknown 19	Cyclic /branched	4184.5	615		880 , 1.070	2862311
		188	Unknown 21	Cyclic /branched	3762.2	692		900 , 1.030	77556075
		192	7-Tetradecene, (E)-	Cyclic /branched	3734	814		904 , 1.000	116979890
		194	Bicyclo[6.1.0]nonane, 9-(1-methylethylidene)-	Cyclic /branched	2873.6	790		904 , 1.070	538537969
		193	Unknown 22	Cyclic /branched	11389	541		904 , 1.020	5291483
		198	E-1,6-Undecadiene	Cyclic /branched	8024.4	812		912 , 1.010	410957658
		203	Humulen-(v1)	Cyclic /branched	5191.5	768		916 , 1.080	34268541
		202	Cyclohexene, 1-octyl-	Cyclic /branched	8204.9	824		916 , 1.040	56817055
		201	Tridecane, 3-ethyl-	Cyclic /branched	6196.5	857		916 , 0.990	33611573
		205	Cyclotetradecane	Cyclic /branched	6725.1	882		920 , 1.020	144549316
		207	Cyclohexane, 1-(cyclohexylmethyl)-2-methyl-, trans-	Cyclic /branched	9818.2	822		924 , 1.030	38754688
		208	Pentadecane	Cyclic /branched	8484.3	877		928 , 0.990	58790809
		211	Cyclopropa[1,2:1,3]dicyclopenten-3(3aH)-one, 1,2,3b,6-tetrahydro-3a,6,6-trimethyl-	Cyclic /branched	7257.2	709		932 , 1.090	27018114
		210	Unknown 24	Cyclic /branched	2754.3	552		932 , 1.080	5332687
		209	Z-10-Pentadecen-1-ol	Cyclic /branched	4259.9	764		932 , 1.030	91867447
		216	Cyclopentane, 1,1'-(1,4-butandiyl)bis-	Cyclic /branched	12542	721		940 , 1.030	152715527
		218	11-Tridecyn-1-ol	Cyclic /branched	4496.8	742		940 , 1.060	81049920
		217	Unknown 26	Cyclic /branched	12542	637		940 , 1.040	3465197
		221	Tetradecane, 3-methyl-	Cyclic /branched	7326.9	908		944 , 1.000	61426848
		222	Spiro[3.6]deca-5,7-dien-1-one,5,9,9-trimethyl	Cyclic /branched	20990	795		944 , 1.090	31192189
		226	Cyclohexene, 1-octyl-	Cyclic /branched	3876.7	874		952 , 1.060	23109164
		225	Cyclopentadecane	Cyclic /branched	6228.9	872		952 , 1.020	62405120
		228	Unknown 28	Cyclic /branched	9180.7	688		952 , 1.100	5675825
		227	Benzene, octyl-	Cyclic /branched	2197.9	775		952 , 1.090	47510403
		233	Cyclopentadecane	Cyclic /branched	12679	896		960 , 1.040	70487893
		238	7-Pentadecyne	Cyclic /branched	1884.1	741		964 , 1.070	44423280
		237	Unknown 32	Cyclic /branched	26042	648		964 , 1.040	19941654
		241	Cyclopentadecane	Cyclic /branched	4665	852		972 , 1.030	31407536
		242	7-Pentadecyne	Cyclic /branched	3024.5	832		972 , 1.050	62669436
		248	7-Pentadecyne	Cyclic /branched	6365.7	799		984 , 1.040	101270783
		251	Sulfurous acid, 2-ethylhexyl hexyl ester	Cyclic /branched	7698	795		988 , 1.000	53615497
		252	Unknown 33	Cyclic /branched	2343.1	591		988 , 1.040	3083634
		255	Cyclotetradecane	Cyclic /branched	5114.9	801		992 , 1.030	184675693
		256	Unknown 34	Cyclic /branched	2401.7	554		992 , 1.040	2328165
		257	Longipinene epoxide	Cyclic /branched	2104.5	772		992 , 1.080	107160831
		258	Unknown 35	Cyclic /branched	3636.2	668		996 , 1.050	26555739
		261	Benzene, (1-ethylheptyl)-	Cyclic /branched	12222	740		1000 , 1.090	58370158
		260	Decane	Cyclic /branched	11380	859		1000 , 1.010	61874827
		264	Unknown 38	Cyclic /branched	1899	690		1004 , 1.080	19075304
		267	Cyclopentadecane	Cyclic /branched	4870.6	860		1008 , 1.040	105673593
		266	Pentadecane, 2-methyl-	Cyclic /branched	6230.5	885		1008 , 1.010	20217108
		270	Cyclopentadecanol	Cyclic /branched	3459.8	808		1012 , 1.070	12158264
		269	n-Nonylcyclohexane	Cyclic /branched	7416.4	720		1012 , 1.050	2111180
		273	Pentadecane, 3-methyl-	Cyclic /branched	5298.3	902		1016 , 1.010	50124197
		274	7-Octadecyne, 2-methyl-	Cyclic /branched	4263.3	834		1016 , 1.060	42300967
		277	3-Hexadecene, (Z)-	Cyclic /branched	2805.1	881		1020 , 1.030	19013283
		297	Unknown 47	Cyclic /branched	4245.8	612		1048 , 1.050	3803954
		296	Unknown 46	Cyclic /branched	4710.7	584		1048 , 1.040	40241639
		300	Oxalic acid, butyl cyclohexylmethyl ester	Cyclic /branched	20898	811		1052 , 1.050	832190901
		299	Heptadecane	Cyclic /branched	3393.7	876		1052 , 1.020	45173689
		310	Pentadecane	Cyclic /branched	9166.7	891		1064 , 1.020	118797460
		317	3-Heptadecene, (Z)-	Cyclic /branched	4370.3	768		1076 , 1.040	46647582
		318	Cyclopentane, undecyl-	Cyclic /branched	2813.6	797		1076 , 1.060	93017447
		316	Tetradecane, 1-iodo-	Cyclic /branched	6807.7	842		1076 , 1.020	27251515
		322	Cyclododecanemethanol	Cyclic /branched	3694.8	766		1084 , 1.040	45287605
		324	1-Decanol, 2-hexyl-	Cyclic /branched	4618.9	863		1088 , 1.020	106230659
		326	8-Heptadecene	Cyclic /branched	6200.6	884		1092 , 1.060	68469203
		333	3-Heptadecene, (Z)-	Cyclic /branched	7914.7	825		1104 , 1.060	53310961
		335	5-Heptadecene, 1-bromo-	Cyclic /branched	2137.8	772		1108 , 1.080	47471523
		339	Unknown 55	Cyclic /branched	2520.5	623		1112 , 1.070	3700705
		338	8-Heptadecene	Cyclic /branched	3358.9	875		1112 , 1.050	42725338
		343	E,Z-2,13-Octadecadien-1-ol	Cyclic /branched	1944.7	804		1120 , 1.090	51470604
		347	E-2-Octadecadecen-1-ol	Cyclic /branched	6277.1	761		1124 , 1.060	59480424
		349	Tetradecane, 4-ethyl-	Cyclic /branched	9118.5	880		1128 , 1.030	188920180
		353	5-Octadecene, (E)-	Cyclic /branched	3650.9	846		1132 , 1.040	34816695
		355	Heptadecane, 2-methyl-	Cyclic /branched	8030.7	924		1136 , 1.030	94775829
		358	1-Eicosanol	Cyclic /branched	1704.4	827		1140 , 1.070	87523398
		357	E-7-Octadecene	Cyclic /branched	1910.9	752		1140 , 1.060	9566735
		362	Cyclohexane, undecyl-	Cyclic /branched	4002.9	747		1144 , 1.080	11318780
		364	9-Eicosyne	Cyclic /branched	3185.6	801		1148 , 1.090	60042786
		369	Unknown 63	Cyclic /branched	5462	586		1156 , 1.080	51611021
		377	1-Octadecanol	Cyclic /branched	3244.6	871		1172 , 1.070	63661720
		378	Unknown 65	Cyclic /branched	2588.4	699		1180 , 1.090	6040638
		381	Pentadecane, 8-hexyl-	Cyclic /branched	8823.3	876		1188 , 1.050	85244181
		385	Octadecane, 2-methyl-	Cyclic /branched	4174.6	897		1196 , 1.050	73818121
		388	Cyclododecanemethanol	Cyclic /branched	6506.6	824		1200 , 1.090	83681429
		389	1-Octadecanol	Cyclic /branched	1917.9	779		1204 , 1.100	27666148
		394	Unknown 69	Cyclic /branched	3510.4	526		1212 , 1.090	19368015
		393	2-Ethyl-1-dodecanol	Cyclic /branched	4016.6	882		1212 , 1.070	303721845
		401	1-Nonadecene	Cyclic /branched	4425.4	900		1228 , 1.100	68455384
		402	Eicosane, 2-methyl-	Cyclic /branched	2516.6	854		1232 , 1.070	27978849
		403	1-Docosene	Cyclic /branched	2001.7	858		1236 , 1.080	58310372
		405	Oxalic acid, di(cyclohexylmethyl) ester	Cyclic /branched	14619	791		1240 , 1.110	19563662
		406	Pentadecane, 2,6,10-trimethyl-	Cyclic /branched	7152.7	851		1244 , 1.070	75981879
		408	9-Nonadecene	Cyclic /branched	4558.6	811		1248 , 1.110	91238249
		410	Unknown 71	Cyclic /branched	2768.3	690		1252 , 1.140	29980773
		409	Nonadecane, 2-methyl-	Cyclic /branched	3238.8	929		1252 , 1.070	42769210
		413	Eicosane, 2-methyl-	Cyclic /branched	1773.7	880		1260 , 1.080	31942210
		415	Unknown 73	Cyclic /branched	4447.7	699		1264 , 1.120	797297072
		418	1-Eicosene	Cyclic /branched	6506.4	759		1268 , 1.110	132905053
		426	1-Eicosene	Cyclic /branched	3169.5	703		1284 , 1.120	84744780
		425	Nonadecane	Cyclic /branched	3319	851		1284 , 1.100	109222697
		427	Cyclooctane, cyclohexyl-	Cyclic /branched	7402	763		1292 , 1.140	70871020
		429	5-Tridecene, (Z)-	Cyclic /branched	2084.9	748		1296 , 1.120	50536192
		428	Pentadecane	Cyclic /branched	5927.6	873		1296 , 1.100	70213516
		430	Unknown 76	Cyclic /branched	10551	618		1296 , 1.140	1059137
		431	Cycloeicosane	Cyclic /branched	8354.3	841		1300 , 1.140	102523858
		432	Unknown 77	Cyclic /branched	2454.6	683		1304 , 1.160	3572632
		435	Cyclododecanemethanol	Cyclic /branched	8878	799		1312 , 1.170	240378649
		434	Nonadecane, 2-methyl-	Cyclic /branched	2502.2	871		1312 , 1.110	88133060
		441	Cyclohexene, 3-nonyl-	Cyclic /branched	2990.8	831		1332 , 1.210	26105134
		445	1-Nonadecene	Cyclic /branched	2724.8	893		1336 , 1.160	146360408
		448	2-Tetradecyne	Cyclic /branched	1815.5	748		1340 , 1.200	18149517
		447	Unknown 81	Cyclic /branched	3053.7	542		1340 , 1.180	3076788
		449	Octadecane	Cyclic /branched	3022.5	867		1344 , 1.150	13272241
		450	Unknown 82	Cyclic /branched	1978.6	556		1344 , 1.220	6389376
		452	Eicosane, 2,4-dimethyl-	Cyclic /branched	6027.5	846		1352 , 1.160	42908330
		453	Oxalic acid, di(cyclohexylmethyl) ester	Cyclic /branched	11427	810		1352 , 1.210	30070774
		455	Eicosane, 2-methyl-	Cyclic /branched	1631.6	824		1364 , 1.180	35556215
		457	Oxalic acid, cyclohexylmethyl propyl ester	Cyclic /branched	7115.7	815		1368 , 1.250	20073582
		458	1-Octene, 3,7-dimethyl-	Cyclic /branched	3697.7	809		1372 , 1.220	0
		466	Cyclotetracosane	Cyclic /branched	5063.2	870		1392 , 1.260	63782465
		471	Cyclohexane, 1-ethyl-1,3-dimethyl-, trans-	Cyclic /branched	3737.3	788		1404 , 1.310	6065747
		472	Cyclohexane, 1-methyl-3-pentyl-	Cyclic /branched	7075.4	836		1408 , 1.310	16515478
		473	Docosane	Cyclic /branched	2512.9	779		1412 , 1.250	8496945
		474	Cyclooctane, (1-methylpropyl)-	Cyclic /branched	2217.8	771		1416 , 1.300	20760982
		475	Unknown 85	Cyclic /branched	2217.8	593		1416 , 1.310	4394470
		483	1-Docosene	Cyclic /branched	3241.5	876		1448 , 1.370	48479823
		486	Tetradecane, 1-iodo-	Cyclic /branched	2210.4	838		1464 , 1.340	13895635
		487	Cyclohexane, 1,1'-(1,2-dimethyl-1,2-ethanediyl)bis-	Cyclic /branched	1945.2	805		1464 , 1.430	8713102
		488	Cyclohexane, 1-isopropyl-1-methyl-	Cyclic /branched	3935.8	843		1472 , 1.440	8486233
		489	Decane, 2,3,5,8-tetramethyl-	Cyclic /branched	1954.1	824		1492 , 1.440	3198016
		492	n-Heptadecylcyclohexane	Cyclic /branched	2735	822		1500 , 1.520	21374587
		495	Oxalic acid, di(cyclohexylmethyl) ester	Cyclic /branched	2806.7	856		1540 , 1.590	7434440
		3	Benzaldehyde	Aromatic(Benzenes ,Napthalenes)	2270.3	865		540 , 1.110	2712695
		6	Benzene, 1-ethyl-4-methyl-	Aromatic(Benzenes ,Napthalenes)	25980	873		556 , 1.040	15737948
		10	Benzene, 1-ethenyl-2-methyl-	Aromatic(Benzenes ,Napthalenes)	2277.3	854		568 , 1.050	3477830
		9	Benzene, 1,2,3-trimethyl-	Aromatic(Benzenes ,Napthalenes)	9522.3	904		568 , 1.030	6964391
		13	Benzene, 1,2,3-trimethyl-	Aromatic(Benzenes ,Napthalenes)	5633.9	885		596 , 1.050	5160647
		17	Benzene, cyclopropyl-	Aromatic(Benzenes ,Napthalenes)	4434.9	880		612 , 1.080	3651327
		20	Benzene, 1-methyl-3-propyl-	Aromatic(Benzenes ,Napthalenes)	12959	857		616 , 1.030	11579702
		21	Bicyclo[3.2.1]oct-2-ene, 3-methyl-4-methylene-	Aromatic(Benzenes ,Napthalenes)	7387.1	850		620 , 1.040	11200449
		23	Benzene, 1-methyl-3-propyl-	Aromatic(Benzenes ,Napthalenes)	16774	879		632 , 1.050	7747624
		25	Benzaldehyde, 3-methyl-	Aromatic(Benzenes ,Napthalenes)	2994.4	866		636 , 1.140	2276909
		27	Unknown 1	Aromatic(Benzenes ,Napthalenes)	1992.7	676		640 , 1.170	1587002
		26	Benzene, 2-ethyl-1,4-dimethyl-	Aromatic(Benzenes ,Napthalenes)	23723	920		640 , 1.060	11079778
		30	Benzene, 1-methyl-2-(1-methylethyl)-	Aromatic(Benzenes ,Napthalenes)	25239	909		648 , 1.070	9047564
		33	Benzene, 1-butenyl-, (E)-	Aromatic(Benzenes ,Napthalenes)	7197.1	896		656 , 1.080	9428757
		38	Benzene, 1-methyl-2-(1-methylethyl)-	Aromatic(Benzenes ,Napthalenes)	8281.9	870		668 , 1.080	17855703
		42	Benzene, 2-ethyl-1,3-dimethyl-	Aromatic(Benzenes ,Napthalenes)	7621.8	857		680 , 1.070	3741023
		46	Benzene, (2-methyl-2-propenyl)-	Aromatic(Benzenes ,Napthalenes)	1832.6	858		684 , 1.090	2920667
		53	Penta-2-en-4-yne,-2,5-dicyclopropyl	Aromatic(Benzenes ,Napthalenes)	2917	754		696 , 1.070	6667926
		54	Benzene, 1-ethenyl-4-ethyl-	Aromatic(Benzenes ,Napthalenes)	4959.5	830		700 , 1.110	3397167
		56	1H-Indene, 2,3-dihydro-4,7-dimethyl-	Aromatic(Benzenes ,Napthalenes)	7364.2	755		704 , 1.090	1426624
		58	Benzene, 2,4-diethyl-1-methyl-	Aromatic(Benzenes ,Napthalenes)	2122.4	700		708 , 1.080	1648549
		57	Benzene, pentyl-	Aromatic(Benzenes ,Napthalenes)	9672.5	868		708 , 1.060	30760061
		62	1H-Indene, 2,3-dihydro-4-methyl-	Aromatic(Benzenes ,Napthalenes)	29546	862		712 , 1.120	12587361
		61	Benzene, 1,2,3,5-tetramethyl-	Aromatic(Benzenes ,Napthalenes)	2700.7	762		712 , 1.090	1022397
		64	Benzene, 1-butynyl-	Aromatic(Benzenes ,Napthalenes)	3806.4	880		716 , 1.130	2285682
		68	Benzene, (1-methylbutyl)-	Aromatic(Benzenes ,Napthalenes)	8061.7	723		720 , 1.070	3458429
		72	Unknown 5	Aromatic(Benzenes ,Napthalenes)	1711.9	665		724 , 1.090	3568093
		71	Benzene, 1-methyl-4-(1-methylpropyl)-	Aromatic(Benzenes ,Napthalenes)	14125	783		724 , 1.070	8944415
		73	Naphthalene, 1,2,3,4-tetrahydro-	Aromatic(Benzenes ,Napthalenes)	14550	881		724 , 1.140	5981040
		78	Benzene, 1-methyl-3-(1-methyl-2-propenyl)-	Aromatic(Benzenes ,Napthalenes)	3042.4	810		732 , 1.090	1519337
		82	1H-Indene, 1,3-dimethyl-	Aromatic(Benzenes ,Napthalenes)	4836.3	830		736 , 1.130	1453435
		92	Naphthalene	Aromatic(Benzenes ,Napthalenes)	32097	921		748 , 1.190	15319888
		130	Naphthalene, 1,2-dihydro-3-methyl-	Aromatic(Benzenes ,Napthalenes)	5916.3	737		808 , 1.160	8817581
		129	1H-Indene, 2,3-dihydro-1,2-dimethyl-	Aromatic(Benzenes ,Napthalenes)	20545	816		808 , 1.140	14060940
		135	Naphthalene, 1,2,3,4-tetrahydro-1,1-dimethyl-	Aromatic(Benzenes ,Napthalenes)	8718	786		816 , 1.130	15454739
		139	1H-Indene, 2,3-dihydro-4,7-dimethyl-	Aromatic(Benzenes ,Napthalenes)	20942	857		824 , 1.140	5632628
		145	Naphthalene, 1,2,3,4-tetrahydro-6-methyl-	Aromatic(Benzenes ,Napthalenes)	4390.1	858		832 , 1.170	6498385
		147	Naphthalene, 2-methyl-	Aromatic(Benzenes ,Napthalenes)	46402	917		836 , 1.200	19546358
		156	Naphthalene, 2-methyl-	Aromatic(Benzenes ,Napthalenes)	53968	930		852 , 1.220	19924468
		166	Unknown 15	Aromatic(Benzenes ,Napthalenes)	1911	644		868 , 1.170	303411
		165	Cyclopropene, 2,3-dimethyl-3-phenyl-	Aromatic(Benzenes ,Napthalenes)	1911	781		868 , 1.160	941876
		170	Naphthalene, 6-ethyl-1,2,3,4-tetrahydro-	Aromatic(Benzenes ,Napthalenes)	8605.6	821		872 , 1.150	12090981
		180	Naphthalene, 5-ethyl-1,2,3,4-tetrahydro-	Aromatic(Benzenes ,Napthalenes)	3582.6	796		884 , 1.160	12809600
		183	Unknown 20	Aromatic(Benzenes ,Napthalenes)	3123.8	638		888 , 1.170	142476
		185	1H-Inden-1-one, 2,3-dihydro-3,4,7-trimethyl-	Aromatic(Benzenes ,Napthalenes)	5701.6	745		892 , 1.140	11861138
		187	(1-Methylpenta-1,3-dienyl)benzene	Aromatic(Benzenes ,Napthalenes)	3544.6	710		896 , 1.170	12237650
		190	Naphthalene, 1,2,3,4-tetrahydro-6-propyl-	Aromatic(Benzenes ,Napthalenes)	8330.8	785		900 , 1.130	12309237
		191	Biphenyl	Aromatic(Benzenes ,Napthalenes)	10401	923		900 , 1.230	4561258
		199	1H-Inden-1-one, 2,3-dihydro-3,4,7-trimethyl-	Aromatic(Benzenes ,Napthalenes)	5692.2	731		912 , 1.120	10511570
		200	Naphthalene, 1,2,3,4-tetrahydro-5,7-dimethyl-	Aromatic(Benzenes ,Napthalenes)	2683	808		912 , 1.160	4698037
		204	Naphthalene, 1-ethyl-	Aromatic(Benzenes ,Napthalenes)	31886	898		916 , 1.220	33521467
		206	Naphthalene, 1,2,3,4-tetrahydro-6-propyl-	Aromatic(Benzenes ,Napthalenes)	5639	719		920 , 1.140	8600016
		212	Unknown 25	Aromatic(Benzenes ,Napthalenes)	2238.3	521		936 , 1.130	22554046
		215	Naphthalene, 2,6-dimethyl-	Aromatic(Benzenes ,Napthalenes)	38721	944		936 , 1.230	25701975
		213	Naphthalene, 1,2,3,4-tetrahydro-6-propyl-	Aromatic(Benzenes ,Napthalenes)	5382.7	775		936 , 1.150	22741846
		214	Acenaphthylene, 1,2,2a,3,4,5-hexahydro-	Aromatic(Benzenes ,Napthalenes)	1775.3	736		936 , 1.210	3668651
		219	Diphenylmethane	Aromatic(Benzenes ,Napthalenes)	2072.5	817		940 , 1.240	1564715
		223	1-Phenyl-1-heptyne	Aromatic(Benzenes ,Napthalenes)	5125.8	771		944 , 1.190	9518349
		231	Naphthalene, 2,6-dimethyl-	Aromatic(Benzenes ,Napthalenes)	17060	915		952 , 1.250	13973609
		229	Unknown 29	Aromatic(Benzenes ,Napthalenes)	2478.4	692		952 , 1.170	2148287
		230	1H-Indene, 1-methyl-3-propyl-	Aromatic(Benzenes ,Napthalenes)	5065.3	748		952 , 1.190	5211461
		232	Biphenylene, 1,2,3,6,7,8,8a,8b-octahydro-4,5-dimethyl-	Aromatic(Benzenes ,Napthalenes)	3464.4	776		956 , 1.140	28828231
		234	Unknown 30	Aromatic(Benzenes ,Napthalenes)	3549.3	682		960 , 1.130	6761554
		235	Unknown 31	Aromatic(Benzenes ,Napthalenes)	2885.9	632		960 , 1.200	1661470
		236	Naphthalene, 2-(1-methylethyl)-	Aromatic(Benzenes ,Napthalenes)	7720.5	800		960 , 1.220	4060813
		239	Naphthalene, 2,6-dimethyl-	Aromatic(Benzenes ,Napthalenes)	10252	886		964 , 1.270	7840552
		244	1H-Inden-1-one, 2,3-dihydro-3,4,7-trimethyl-	Aromatic(Benzenes ,Napthalenes)	2462	711		972 , 1.200	5121486
		243	1H-Indene, 3-ethenyl-2,3-dihydro-1,1-dimethyl-	Aromatic(Benzenes ,Napthalenes)	2462	788		972 , 1.190	4648887
		245	1H-Cyclopenta[1,3]cyclopropa[1,2]benzene, octahydro-7-methyl-3-methylene-4-(1-methylethyl)-, [3aS-(3aà,3bá,4á,7à,7aS*)]-	Aromatic(Benzenes ,Napthalenes)	6864.5	778		976 , 1.110	24019819
		246	1,1'-Biphenyl, 4-methyl-	Aromatic(Benzenes ,Napthalenes)	9210.6	900		976 , 1.240	3493985
		247	1,8-Cyclopentadecadiyne	Aromatic(Benzenes ,Napthalenes)	4603.4	709		980 , 1.140	13159890
		249	Naphthalene, 1-propyl-	Aromatic(Benzenes ,Napthalenes)	19028	860		984 , 1.220	11029701
		250	1,1'-Biphenyl, 4-methyl-	Aromatic(Benzenes ,Napthalenes)	3089.7	861		984 , 1.240	1539169
		254	Acenaphthene	Aromatic(Benzenes ,Napthalenes)	7080.9	881		988 , 1.310	4134697
		253	Biphenylene, 1,2,3,6,7,8,8a,8b-octahydro-4,5-dimethyl-	Aromatic(Benzenes ,Napthalenes)	1743.5	777		988 , 1.160	12408288
		259	Naphthalene, 1,4,5-trimethyl-	Aromatic(Benzenes ,Napthalenes)	23548	899		996 , 1.230	29873415
		263	Unknown 37	Aromatic(Benzenes ,Napthalenes)	3624.7	699		1000 , 1.160	5491199
		265	1-Isopropenylnaphthalene	Aromatic(Benzenes ,Napthalenes)	4207.3	772		1004 , 1.290	5065935
		268	Benzene, 1-(1-methyl-2-propenyl)-4-(2-methylpropyl)-	Aromatic(Benzenes ,Napthalenes)	5181.3	768		1008 , 1.160	4755882
		272	Naphthalene, 1,4,5-trimethyl-	Aromatic(Benzenes ,Napthalenes)	19047	883		1012 , 1.250	19586450
		276	1H-Indene, 3-ethyl-1-(1-methylethyl)-	Aromatic(Benzenes ,Napthalenes)	1809.9	784		1016 , 1.210	5770127
		281	Unknown 40	Aromatic(Benzenes ,Napthalenes)	5850.6	602		1024 , 1.180	6885530
		286	Naphthalene, 1,4,5-trimethyl-	Aromatic(Benzenes ,Napthalenes)	10199	892		1028 , 1.260	8572880
		290	Unknown 44	Aromatic(Benzenes ,Napthalenes)	2026.3	666		1036 , 1.230	8409488
		294	Naphthalene, 1,4,5-trimethyl-	Aromatic(Benzenes ,Napthalenes)	7887.7	857		1040 , 1.260	7034158
		293	1,1'-Biphenyl, 2-ethyl-	Aromatic(Benzenes ,Napthalenes)	4143.2	731		1040 , 1.250	3145562
		295	Unknown 45	Aromatic(Benzenes ,Napthalenes)	1924.2	651		1044 , 1.220	2258009
		307	Fluorene	Aromatic(Benzenes ,Napthalenes)	12731	900		1056 , 1.340	5310780
		305	Unknown 51	Aromatic(Benzenes ,Napthalenes)	1886.2	685		1056 , 1.260	1230088
		304	Naphthalene, 2-butyl-	Aromatic(Benzenes ,Napthalenes)	5898.1	834		1056 , 1.240	24934882
		306	Naphthalene, 1,4,5-trimethyl-	Aromatic(Benzenes ,Napthalenes)	3524.6	822		1056 , 1.300	3200745
		313	9H-Fluorene, 2-methyl-	Aromatic(Benzenes ,Napthalenes)	4922.9	824		1068 , 1.320	3735411
		314	Naphthalene, 1-(2-propenyl)-	Aromatic(Benzenes ,Napthalenes)	8745.4	893		1068 , 1.340	9890453
		312	Unknown 53	Aromatic(Benzenes ,Napthalenes)	3209.7	692		1068 , 1.270	4803992
		315	Naphthalene, 2-methyl-1-propyl-	Aromatic(Benzenes ,Napthalenes)	5701.8	795		1072 , 1.250	13033095
		321	1,1'-Biphenyl, 2-ethyl-	Aromatic(Benzenes ,Napthalenes)	3246.8	754		1076 , 1.290	4498918
		325	1,1'-Biphenyl, 2-ethyl-	Aromatic(Benzenes ,Napthalenes)	5163	821		1088 , 1.320	5587345
		328	Benzene, 1,1'-(1,3-propanediyl)bis-	Aromatic(Benzenes ,Napthalenes)	6093.9	846		1092 , 1.280	11978759
		331	Naphthalene, 1-methyl-7-(1-methylethyl)-	Aromatic(Benzenes ,Napthalenes)	3199	809		1096 , 1.290	2836405
		334	2,2'-Dimethylbiphenyl	Aromatic(Benzenes ,Napthalenes)	2385.1	819		1104 , 1.320	2802684
		337	Naphthalene, 1,2,3,4-tetramethyl-	Aromatic(Benzenes ,Napthalenes)	1910	752		1108 , 1.270	5230075
		340	Benzene, 1,1',1'',1'''-(1,5-hexadiene-1,3,4,6-tetrayl)tetrakis-	Aromatic(Benzenes ,Napthalenes)	1689.4	745		1112 , 1.330	1374328
		342	Unknown 57	Aromatic(Benzenes ,Napthalenes)	4789.6	688		1116 , 1.260	2149631
		346	Naphthalene, 1,2,3,4-tetramethyl-	Aromatic(Benzenes ,Napthalenes)	1861.3	811		1120 , 1.290	1595906
		345	1,2,3,3a,8,9,9a,9b-Octahydrocyclopenta[def]phenanthrene	Aromatic(Benzenes ,Napthalenes)	2170.7	750		1120 , 1.260	8607644
		348	Unknown 59	Aromatic(Benzenes ,Napthalenes)	1762	672		1124 , 1.290	1752101
		351	Naphthalene, 1,6-dimethyl-4-(1-methylethyl)-	Aromatic(Benzenes ,Napthalenes)	2162	725		1128 , 1.270	1268575
		422	Benzene, tridecyl-	Aromatic(Benzenes ,Napthalenes)	11570	707		1276 , 1.220	9124343
		424	Benzene, (1-methyldodecyl)-	Aromatic(Benzenes ,Napthalenes)	8828.2	762		1280 , 1.220	9061139
		437	Unknown 79	Aromatic(Benzenes ,Napthalenes)	10170	637		1320 , 1.240	5218131
		438	Benzene, (1,2,2-trimethylpropyl)-	Aromatic(Benzenes ,Napthalenes)	10170	747		1320 , 1.250	3014854
		442	Benzene, tetradecyl-	Aromatic(Benzenes ,Napthalenes)	14618	879		1332 , 1.270	8244695
		443	Unknown 80	Aromatic(Benzenes ,Napthalenes)	2200.1	600		1332 , 1.280	1149173
		446	Benzene, (1,3-dimethylbutyl)-	Aromatic(Benzenes ,Napthalenes)	6920.4	730		1336 , 1.280	7370008
		451	Unknown 83	Aromatic(Benzenes ,Napthalenes)	1947.8	697		1344 , 1.280	2411141
		456	Benzene, 1,1'-[oxybis(methylene)]bis[4-ethyl-	Aromatic(Benzenes ,Napthalenes)	2491.7	724		1364 , 1.330	2275292
		460	Benzene, 1-methyl-3-hexyl-	Aromatic(Benzenes ,Napthalenes)	7828.2	715		1376 , 1.370	4957613
		463	Unknown 84	Aromatic(Benzenes ,Napthalenes)	2483.3	694		1384 , 1.370	1984467
		465	Benzene, pentadecyl-	Aromatic(Benzenes ,Napthalenes)	9440.2	864		1388 , 1.380	5713686
		467	Benzene, (1,3-dimethylbutyl)-	Aromatic(Benzenes ,Napthalenes)	4500.1	759		1392 , 1.400	5570871
		481	Unknown 88	Aromatic(Benzenes ,Napthalenes)	3175.3	678		1436 , 1.510	5522024
		484	Benzene, hexadecyl-	Aromatic(Benzenes ,Napthalenes)	5757.3	891		1448 , 1.530	5261138
		2	Benzene, 1-ethyl-3-methyl-		3433.5	876		536 , 1.020	5195124
		4	1-Decene		9899.6	941		552 , 0.950	96422690
		5	Bicyclo[5.3.0]decane		3509.3	799		556 , 0.980	10497598
		8	Cycloheptane, bromo-		2573.4	803		564 , 0.980	22146618
		11	2-Decyne		1726.1	840		580 , 0.980	24951273
		12	Benzene, 1-methyl-2-(1-methylethyl)-		2495.9	848		592 , 1.020	3129755
		28	1-Undecene		12920	940		644 , 0.980	154439932
		31	7-Propylidene-bicyclo[4.1.0]heptane		1849.9	706		652 , 1.020	2457483
		32	Cyclohexane, 1-methyl-2-propyl-		7552.5	799		656 , 0.980	55730151
		36	Ethanone, 1-(2,5-dimethylphenyl)-		3541.1	766		664 , 1.040	350565
		37	Bicyclopentylidene		1917	761		668 , 1.050	6345748
		67	2,4-Octadiyne		8061.7	727		720 , 1.060	1002213
		75	anti-10-Methyl-endo-tricyclo[5.2.1.0(2.6)]decane		2132.6	744		728 , 1.070	13301700
		77	3-Methylene-1,5,5-trimethylcyclohexene		2476.8	730		732 , 1.050	7151392
		80	Unknown 6		3724	638		736 , 1.070	1444286
		81	Cyclohexene, 1-ethyl-4,5-divinyl-		3082.5	728		736 , 1.080	8374378
		83	3-Dodecene, (E)-		4627.9	941		740 , 0.980	31608166
		86	1H-Indene, 2,3-dihydro-1,2-dimethyl-		26240	884		740 , 1.100	18631461
		93	Decane, 5-propyl-		2844.2	855		752 , 0.970	21340659
		120	Benzene, 1-methyl-3-(1-methyl-2-propenyl)-		14813	876		796 , 1.120	10794758
		131	2,3-Dihydro-1-oxo-1H-phenalene		15094	716		812 , 1.010	1548956
		136	Tridecane		4377.4	908		820 , 0.980	82869549
		137	Cyclooctane, cyclohexyl-		3885.7	787		824 , 1.010	91145958
		138	Unknown 11		2936.6	695		824 , 1.090	18301764
		141	Naphthalene, 1,2,3,4-tetrahydro-1,1-dimethyl-		18240	854		828 , 1.120	11143512
		174	Unknown 18		2114	497		876 , 1.120	434119
		177	Benzene, 1-methyl-3-hexyl-		18705	767		880 , 1.090	36072825
		179	1H-Inden-1-one, 2,3-dihydro-3,4,7-trimethyl-		2889.8	710		884 , 1.120	6216356
		178	3-Tridecen-1-yne, (Z)-		2751.3	765		884 , 1.070	38437962
		182	Cyclopropa[1,2:1,3]dicyclopenten-3(3aH)-one, 1,2,3b,6-tetrahydro-3a,6,6-trimethyl-		8147.6	749		888 , 1.110	5982280
		181	Cyclotetradecane		14625	912		888 , 1.030	351141115
		189	5,9-Tetradecadiyne		1795.6	741		900 , 1.080	6293001
		196	Ethanone, 1-(2-methylphenyl)-		2427.1	817		904 , 1.300	2973920
		195	1,1,3a-Trimethyl-1a,3a,5,6-tetrahydro-1H-cyclopropa[c]pentalen-4-one		4243.9	706		904 , 1.100	58414940
		197	Unknown 23		4670.7	560		908 , 1.090	113832
		220	Ethanone, 1-(2-methylphenyl)-		3345.3	729		940 , 1.310	3897852
		224	Unknown 27		5923	625		948 , 1.110	3718555
		262	Unknown 36		12222	625		1000 , 1.100	36647215
		271	Bicyclo[3.1.1]heptane, 2,6,6-trimethyl-3-(2-propenyl)-, (1à,2á,3à,5à)-		1655	800		1012 , 1.100	22059027
		275	Spiro[3.6]deca-5,7-dien-1-one,5,9,9-trimethyl		21308	708		1016 , 1.100	46981227
		278	Unknown 39		5799.3	695		1020 , 1.120	1985926
		279	Cyclohexene, 1-nonyl-		3524.9	843		1024 , 1.080	35322519
		280	Benzene, nonyl-		10209	859		1024 , 1.110	16964976
		282	1-Hexadecanol		9405.2	918		1028 , 1.050	130692467
		285	á-Vatirenene		1986.1	717		1028 , 1.160	7684416
		283	Unknown 41		1936.7	636		1028 , 1.120	8348626
		284	Hexane, 2-phenyl-3-propyl-		6277.4	722		1028 , 1.130	8382713
		288	Unknown 42		4658.7	598		1032 , 1.070	1428438
		289	Unknown 43		6322.4	679		1032 , 1.140	3783189
		292	11-Hexadecen-1-ol, acetate, (Z)-		2486.3	794		1040 , 1.070	40959437
		291	2-Ethyl-1-dodecanol		7184.6	855		1040 , 1.010	66445408
		298	Unknown 48		2206.9	690		1048 , 1.150	5633371
		301	8-Hexadecyne		2222.7	766		1052 , 1.080	32254929
		302	Unknown 49		9143.9	536		1056 , 1.060	3729305
		303	Unknown 50		5940	663		1056 , 1.110	22629358
		308	cis-7-Tetradecen-1-yl acetate		1957.7	724		1060 , 1.060	90245738
		309	Unknown 52		1902.4	496		1060 , 1.070	2738964
		311	4,6,6-Trimethyl-2-(3-methylbuta-1,3-dienyl)-3-oxatricyclo[5.1.0.0(2,4)]octane		12721	760		1068 , 1.120	33964381
		319	Unknown 54		3431	672		1076 , 1.080	25054540
		320	1H-Indene, 5-hexyl-2,3-dihydro-		4423.3	755		1076 , 1.180	8738885
		323	Spiro[3.6]deca-5,7-dien-1-one,5,9,9-trimethyl		19496	702		1084 , 1.120	35470293
		327	Benzene, decyl-		7239.6	798		1092 , 1.140	13911074
		329	1-Decanol, 2-hexyl-		7902.8	821		1096 , 1.050	67067718
		330	Benzene, (1-methylnonyl)-		5757.7	742		1096 , 1.150	23603026
		336	Caryophyllene oxide		1725.6	737		1108 , 1.120	55386626
		341	Unknown 56		1685.3	681		1116 , 1.130	14652446
		344	Unknown 58		2547.4	520		1120 , 1.170	2498732
		350	Unknown 60		5187.6	688		1128 , 1.250	8415183
		352	2,2'-Dimethylbiphenyl		3290.7	727		1128 , 1.340	808095
		354	Cyclopropa[1,2:1,3]dicyclopenten-3(3aH)-one, 1,2,3b,6-tetrahydro-3a,6,6-trimethyl-		9892.8	720		1132 , 1.130	13217881
		356	9H-Fluorene, 2-methyl-		13184	893		1136 , 1.370	9728892
		359	Unknown 61		1900.8	679		1140 , 1.270	2002709
		360	9H-Fluorene, 9,9-dimethyl-		5047.7	771		1140 , 1.340	2474012
		361	1,1'-Biphenyl, 2-ethyl-		1694.5	758		1140 , 1.350	6028198
		363	9H-Fluorene, 1-methyl-		3352.4	900		1144 , 1.400	1917563
		366	Azulene, 1,4-dimethyl-7-(1-methylethyl)-		1728.6	718		1148 , 1.280	2216082
		367	9H-Fluorene, 9,9-dimethyl-		3885.4	825		1148 , 1.370	3138709
		365	2,8-Decadiyne		18751	726		1148 , 1.140	33214457
		368	Unknown 62		2533.7	615		1152 , 1.160	3677395
		371	Unknown 64		2581.7	462		1156 , 1.230	2766450
		370	Benzene, undecyl-		4465.4	782		1156 , 1.160	12342493
		372	2,2'-Dimethylbiphenyl		1791.7	772		1156 , 1.390	529352
		374	Benzene, (1-methyldecyl)-		4302	710		1160 , 1.180	31852556
		375	9H-Fluoren-9-one		1755.5	826		1160 , 1.490	1219135
		376	1-Octadecanol		5852	802		1164 , 1.070	28410351
		379	Naphthalene, 1-hexyl-		3441.3	796		1180 , 1.290	3221559
		380	Unknown 66		1919.8	545		1184 , 1.190	3770387
		382	Naphthalene, 2-hexyl-		4647.2	796		1188 , 1.280	5660539
		387	Unknown 67		1716.9	633		1196 , 1.220	778819
		386	Bicyclo[10.6.0]octadeca-1(12),15-diene		7233.3	773		1196 , 1.160	16098219
		390	1,13-Tetradecadiene		5691.5	789		1204 , 1.110	55765930
		391	Unknown 68		1957	645		1204 , 1.220	1989562
		392	2,8-Decadiyne		17628	725		1208 , 1.170	45928420
		397	Benzene, dodecyl-		4099.1	803		1220 , 1.200	11398821
		400	Benzene, (1-methylundecyl)-		8028	730		1224 , 1.180	8247448
		404	Unknown 70		1996.1	588		1236 , 1.200	989088
		407	Heptacosane		3853.2	925		1244 , 2.330	43936831
		411	Unknown 72		5970.6	686		1252 , 1.190	3282012
		416	Unknown 74		2018.4	699		1264 , 1.150	24350280
		417	Unknown 75		9137.7	696		1264 , 1.200	13976900
		419	9,12-Octadecadienal		2407.9	763		1268 , 1.160	60127573
		423	1-Octadecyne		2745.6	814		1280 , 1.150	100581593
		433	Unknown 78		2058.1	697		1308 , 1.370	3014060
		436	Cyclohexane, 1,1'-(1,4-butanediyl)bis-		8746.7	779		1320 , 1.170	16792084
		444	Phenanthrene, 2,5-dimethyl-		2624.5	868		1332 , 1.680	3589228
		440	Cyclooctane, 1,2-diethyl-		2536.3	717		1332 , 1.160	25224026
		454	Pyrene		1889.7	873		1352 , 1.880	702495
		459	1-Tricosanol		4767.5	749		1376 , 1.240	47206597
		464	Pyrene		4219.6	896		1384 , 2.120	2269790
		462	Cyclooctane, 1,2-diethyl-		1674.2	810		1384 , 1.260	94890978
		468	Heptacosane		3545.4	926		1392 , 2.440	28245176
		470	1,1'-Bicycloheptyl		1850.5	799		1400 , 1.330	4035310
		469	Pentadecane		3676.7	825		1400 , 1.230	44068750
		476	Docosane, 2,21-dimethyl-		2910.4	840		1420 , 1.260	34292624
		477	Ethanone, 1-(1-methylcyclohexyl)-		1921	810		1424 , 1.360	5854926
		478	1-Octadecanol		4706.8	766		1432 , 1.330	139568905
		480	Unknown 87		2474.9	673		1436 , 1.400	6440184
		482	Unknown 89		2682.7	558		1440 , 0.810	48771238
		485	Benzene, (1-methylpentadecyl)-		2371.1	785		1452 , 1.550	1825053
		491	Cyclopentadecane		2813.2	754		1496 , 1.490	92926991
		493	Benzene, 1-methyl-3-hexyl-		2465.2	719		1500 , 1.670	2100339
		494	n-Heptadecylbenzene		2445.3	804		1516 , 1.710	2749140
		496	Heptacosane		2160.3	906		1552 , 2.840	24482356
		497	Octadecane		2236.2	900		1564 , 1.580	18751316
		499	Cyclohexane, (1-methylethyl)-		1826.3	781		1572 , 1.690	3474905
		Total	Total						123295648368
		Area % of each class from classification
		#	Class	Area % in each Class
		1	Saturate	9.742
		2	Cyclic /branched	53.983
		3	Aromatic(Benzenes ,Napthalenes)	10.99
		4	Phenanthrene	0.245
			Unclassified	25.04
			Total	100
